# Supplementary material
Source: PubMed Central journal article supplement (PMC3156151)
Supplement: 1105632108_pnas.201105632SI.pdf [file 1105632108_pnas.201105632SI.pdf]

# Supporting Information

Billon-Galés et al. 10.1073/pnas.1105632108

## SI Text

**Fig. S1: Schematic Representation of the Strategy Used to Generate Estrogen Receptor- $\alpha$  Activation Function 2 Null Mutants Mice.** Mouse estrogen receptor- $\alpha$  (mER $\alpha$ ) genomic clones were isolated by screening a 129/Sv ES cell DNA library with an mER $\alpha$  cDNA probe (nucleotides 177–2007) (1). A genomic 16-kb NotI fragment, containing the mER $\alpha$  exons 7 and 8 sequences, was identified with the cDNA probe encoding amino acids 539–552 (nucleotides 1805–1846). A motif essential for the transcriptional activation function 2 (AF2) present in the E region of ER $\alpha$  (exon 8) has been previously characterized as an amphipathic  $\alpha$ -helix, and its main features are conserved between transcriptionally active members of the nuclear receptor family (2, 3). We generated the targeting vector XhoI-KpnI encoding the amino acids LLEMLD motif (nucleotides 1817–1837 and amino acids 543–549) (1). We isolated and subcloned the EcoRI fragment into the Bluescript II plasmid and performed the deletion of the LLEMLD motif by PCR-based site-directed mutagenesis using primers P1 (5'-ctctacaacatgaatgaagaacgttgccctctatgacgccacgccttcatgccccagcagtcgcatggagtg-3') and P2 (5'-cactccatgagcactggctggggcatgaaggcggggcgtcatagaggggcaaacgttcttctatgttagag-3'; nucleotides 1775–1816 and 1838–1876 and amino acids 529–542 and 550–562) (1). We reconstituted the XhoI-KpnI targeting vector and checked the success of the mutation by sequencing. The TKneo cassette from pHR56<sup>-</sup> (4) was cloned into the PshAI site. The 8-kb XhoI-KpnI fragment of the targeting vector was electroporated into 129/SvPas H1 ES cells (5), and G418 neomycin-resistant clones were expanded (6). ES cells containing a targeted ER $\alpha$ AF2 allele were identified by Southern blot analysis of BamHI- or XhoI-digested ES cell genomic DNA using 5' (P5': 5'-atgaattcggagggcaagtgaggatgagag-3' and 5'-taaagctttcttggaggacagagaga-3') and 3' (P3': 5'-atgaattcgttaagaatcagtgaggat-3' and 5'-taaagcttgcctactacggagactgaaac-3') external probes. The expected sizes of DNA fragments are given in the table. Targeted ES cells were injected into C57BL/6 blastocysts and implanted into pseudopregnant mice hosts of the same strain. Chimeric males were obtained that transmitted the mutation through crosses with C57BL/6 females, yielding heterozygous ER $\alpha$ AF2<sup>+/-</sup> mice. Then, ER $\alpha$ AF2<sup>+/-</sup> mice were bred with homozygous CMV-Cre transgenic mice (7) to delete the selectable marker. Inbreeding of ER $\alpha$ AF2<sup>+/-</sup> mice yielded ER $\alpha$ AF2<sup>-/-</sup> (also designated as ER $\alpha$ AF2<sup>0</sup> or ER $\alpha$ AF-2 KO) mice homozygous for the deletion of the transactivating function 2 core motif. Genotyping on tail biopsy DNA was performed by PCR using primers A1 (5'-atgaattcctaataggtttaaataatgact-3') and A2 (5'-gataccctttgctgttccc-3'). The size of the A1-A2 fragment from the WT allele is 355 bp, and the size of the fragment from the ER $\alpha$ AF2<sup>0</sup> allele is 313 bp.

Male and female ER $\alpha$ AF2<sup>0</sup> are infertile, and ER $\alpha$ AF2<sup>+/-</sup> mice were used as parental progenitors. The litter sizes from this cross are normal, and offspring are produced with equal sex frequency.

**Fig. S2: ER $\alpha$ AF1 Activity Is Preserved in the ER $\alpha$ AF2<sup>0</sup> Mutant.** HepG2 cells were maintained in DMEM (Sigma-Aldrich) supplemented with 10% FCS (Biowest) and antibiotics (Sigma-Aldrich) at 37 °C in 5% CO<sub>2</sub>. Transfections were carried out using jetPEI reagent according to manufacturer's instructions (Polyplus). One day before transfection, cells were plated in 24-well plates at 50% confluence. One hour before transfection, the medium was replaced with phenol red-free DMEM (Sigma-Aldrich) containing 2.5% charcoal-stripped FCS (Biowest). Transfection was carried out with 100 ng C3-LUC reporter gene, 100 ng CMV- $\beta$ Gal internal control, and 50 ng pCR, pCR-ER $\alpha$ , pC-ER $\alpha$ AF1<sup>0</sup> (pCR hER $\alpha$ 46) (8), or pC-ER $\alpha$ AF2<sup>0</sup> expression vectors. After an overnight incubation, cells were treated for 24 h with 4-hydroxytamoxifen (2  $\mu$ M) or vehicle (control). Cells were then harvested, and luciferase and  $\beta$ -galactosidase assays were performed as previously described (8).

**Fig. S3: ER $\alpha$ AF2 Is Necessary for the Effect of Exogenous E2 on Atherosclerosis Prevention in 18-Wk-Old Mice.** Four-week-old ovariectomized ER $\alpha$ AF2<sup>+/+</sup>LDL-r<sup>-/-</sup> and ER $\alpha$ AF2<sup>0</sup>LDL-r<sup>-/-</sup> mice were given either placebo or 17 $\beta$ -estradiol (E2; 80  $\mu$ g/kg per d for 12 wk) and were switched to atherogenic diet from the age of 6–18 wk. For immunohistochemical staining of macrophages, a rat polyclonal anti-CD68 antibody (117–5521; AbCys) was used. Collagen fibers were stained with Sirius red. Quantification (mean  $\pm$  SEM) was performed for CD68 and Sirius red-positive staining areas at the aortic sinus. A two-way ANOVA factor indicated an interaction between E2 treatment and genotype ( $***P < 0.0001$ ), and the protective action of E2 was present only in ER $\alpha$ AF2<sup>+/+</sup>LDL-r<sup>-/-</sup> mice ( $***P < 0.0001$ ).

**Table S1: FGF2 and Osteopontin Are Absolutely Necessary for the Accelerative Effect of E2 on Endothelial Healing but Dispensable for the E2 Atheroprotective Effect.** Mice were ovariectomized at 4 wk and implanted or not with s.c. pellets releasing E2 (9, 10) at 0.1 mg for a 60-d release (i.e., 80  $\mu$ g kg<sup>-1</sup>d<sup>-1</sup>; Innovative Research of America). The results are expressed as means  $\pm$  SEM.

E2 treatment affects uterine weight and fatty streak lesion size in 24-wk-old osteopontin (OPN)<sup>-/-</sup>apoE<sup>-/-</sup> and FGF2<sup>-/-</sup>apoE<sup>-/-</sup> mice.

E2 treatment affects uterine weight and endothelialized area on OPN<sup>-/-</sup> and FGF2<sup>-/-</sup> mice. E2 treatment was initiated 2 wk before carotid injury and continued until the sacrifice.

- White R, Lees JA, Needham M, Ham J, Parker M (1987) Structural organization and expression of the mouse estrogen receptor. *Mol Endocrinol* 1:735–744.
- Danielian PS, White R, Lees JA, Parker MG (1992) Identification of a conserved region required for hormone dependent transcriptional activation by steroid hormone receptors. *EMBO J* 11:1025–1033.
- Durand B, et al. (1994) Activation function 2 (AF-2) of retinoic acid receptor and 9-cis retinoic acid receptor: Presence of a conserved autonomous constitutive activating domain and influence of the nature of the response element on AF-2 activity. *EMBO J* 13:5370–5382.
- Metzger D, Clifford J, Chiba H, Chambon P (1995) Conditional site-specific recombination in mammalian cells using a ligand-dependent chimeric Cre recombinase. *Proc Natl Acad Sci USA* 92:6991–6995.
- Dierich AD, Dollé P (1997) Gene targeting in embryonic stem cells. *Methods in Development Biology/Toxicology*, eds Klug S, Thiel R (Blackwell, Oxford), pp 111–123.
- Lufkin T, Dierich A, LeMeur M, Mark M, Chambon P (1991) Disruption of the Hox-1.6 homeobox gene results in defects in a region corresponding to its rostral domain of expression. *Cell* 66:1105–1119.
- Dupé V, et al. (1997) In vivo functional analysis of the Hoxa-1 3' retinoic acid response element (3'RARE). *Development* 124:399–410.
- Penot G, et al. (2005) The human estrogen receptor- $\alpha$  isoform hER $\alpha$ 46 antagonizes the proliferative influence of hER $\alpha$ 66 in MCF7 breast cancer cells. *Endocrinology* 146:5474–5484.
- Fontaine V, et al. (2006) Essential role of bone marrow fibroblast growth factor-2 in the effect of estradiol on reendothelialization and endothelial progenitor cell mobilization. *Am J Pathol* 169:1855–1862.
- Leen LL, et al. (2008) Estrogen-stimulated endothelial repair requires osteopontin. *Arterioscler Thromb Vasc Biol* 28:2131–2136.

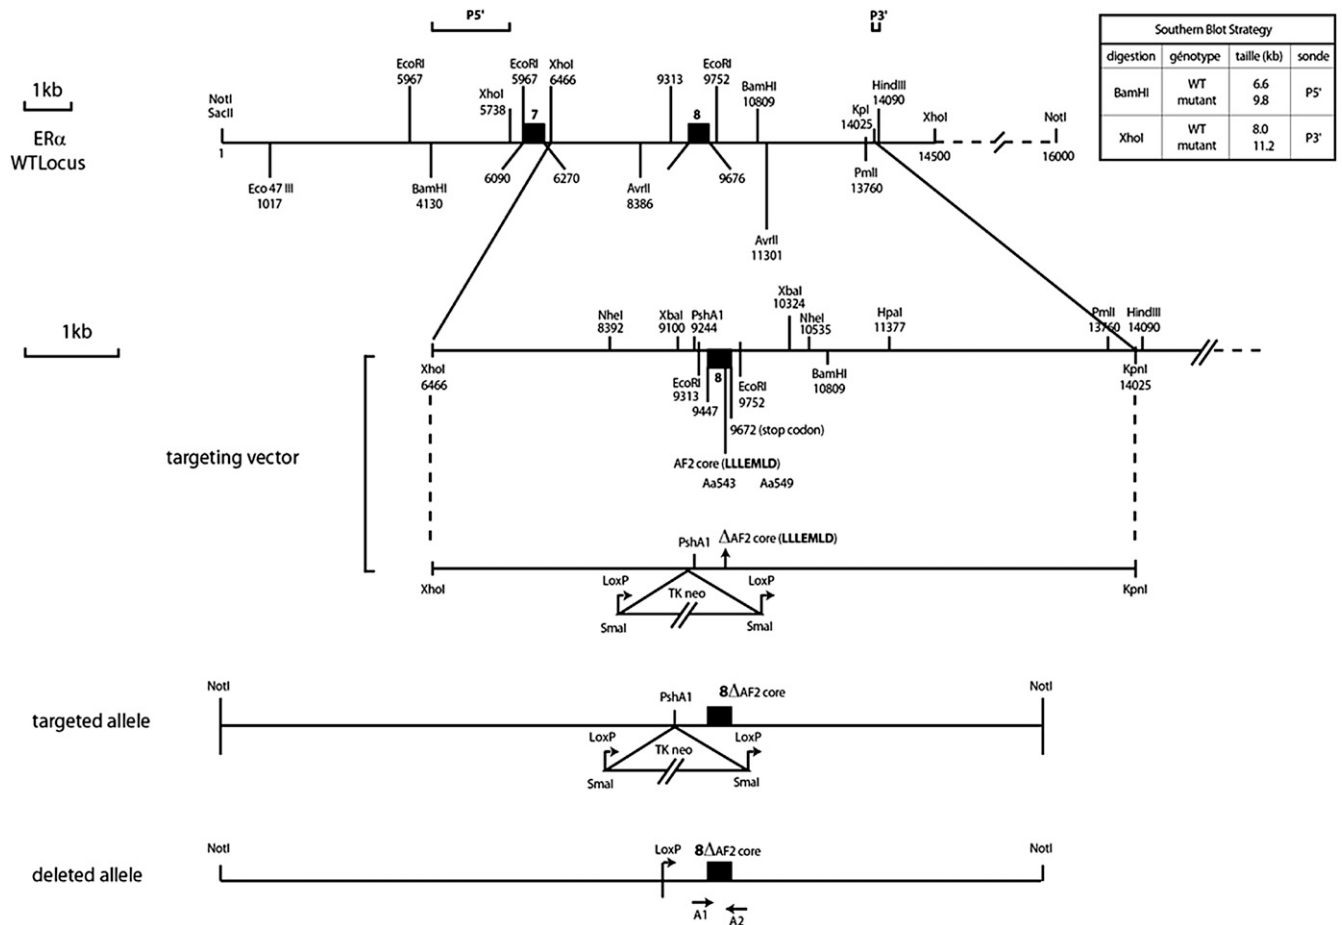

Fig. S1. Schematic representation of the strategy used to generate estrogen receptor- $\alpha$  activation function 2 null mutants mice.

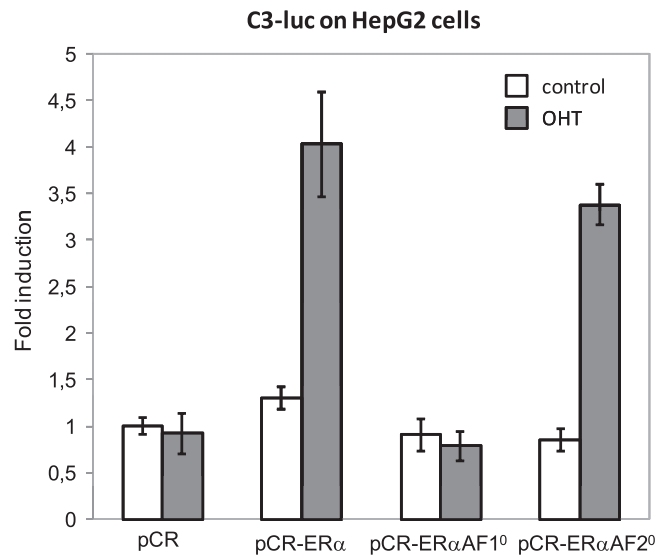

Fig. S2. ER $\alpha$ AF1 activity is preserved in the ER $\alpha$ AF<sup>20</sup> mutant.

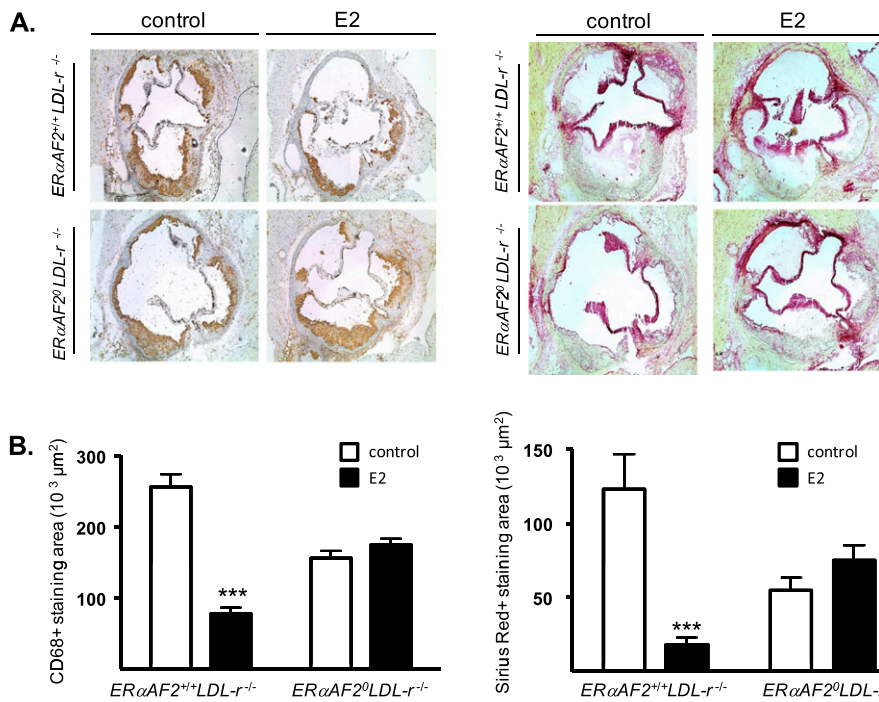

**Fig. S3.** ER $\alpha$ AF2 is necessary for the effect of exogenous E2 on atherosclerosis prevention in 18-wk-old mice.

**Table S1.** FGF2 and osteopontin are absolutely necessary for the accelerative effect of E2 on endothelial healing but dispensable for the E2 atheroprotective effect

|                                                | Placebo                                    | E2          | Placebo                                     | E2          |
|------------------------------------------------|--------------------------------------------|-------------|---------------------------------------------|-------------|
|                                                | <i>OPN<sup>-/-</sup>apoE<sup>-/-</sup></i> |             | <i>FGF2<sup>-/-</sup>apoE<sup>-/-</sup></i> |             |
| Uterine weight (mg)                            | <5                                         | 123 ± 17*   | <5                                          | 182 ± 37*   |
| Percent atherosclerotic lesion vs. placebo     | 100 ± 12                                   | 46.6 ± 8.3* | 100 ± 9.3                                   | 39.9 ± 9.9* |
|                                                | <i>OPN<sup>-/-</sup></i>                   |             | <i>FGF2<sup>-/-</sup></i>                   |             |
| Uterine weight (mg)                            | <5                                         | 148 ± 13*   | <5                                          | 141 ± 12*   |
| Endothelialized area (percent of carotid area) | 25.0 ± 2.9                                 | 26.1 ± 1.9  | 22.8 ± 1.9                                  | 21.7 ± 2.0  |
